# Supplementary material
Source: publisher site journal article supplement (https://www.dovepress.com/article/302144)
Supplement: Supplementary file 1 [file get_supplementary_file.php]

## **Supplementary file 1**

### **DASS-21**

#### **Instruction:**

Please read each statement and choose the number 0, 1, 2 or 3 which indicates how much the statement applied to you over the past month. There are no right or wrong answers. Do not spend too much time on any statement.

#### **The rating scale is as follows:**

- 0 Did not apply to me at all
- 1 Applied to me to some degree, or some of the time
- 2 Applied to me to a considerable degree, or a good part of time
- 3 Applied to me very much, or most of the time

#### **Questions:**

- 1. I found it hard to wind down
- 2. I was aware of dryness of my mouth
- 3. I couldn't seem to experience any positive feeling at all
- 4. I experienced breathing difficulty (eg, excessively rapid breathing, breathlessness in the absence of physical exertion)
- 5. I found it difficult to work up the initiative to do things
- 6. I tended to over-react to situations
- 7. I experienced trembling (eg, in the hands)
- 8. I felt that I was using a lot of nervous energy
- 9. I was worried about situations in which I might panic and make a fool of myself
- 10. I felt that I had nothing to look forward to
- 11. I found myself getting agitated
- 12. I found it difficult to relax
- 13. I felt down-hearted and blue
- 14. I was intolerant of anything that kept me from getting on with what I was doing
- 15. I felt I was close to panic
- 16. I was unable to become enthusiastic about anything
- 17. I felt I wasn't worth much as a person
- 18. I felt that I was rather touchy
- 19. I was aware of the action of my heart in the absence of physical exertion (eg, sense of heart rate increase, heart missing a beat)
- 20. I felt scared without any good reason
- 21. I felt that life was meaningless

Notes: Reproduced from Lovibond, S.H. & Lovibond, P.F. (1995). Manual for the Depression Anxiety & Stress Scales. (2nd Ed.) Sydney: Psychology Foundation. The questionnaires can be downloaded without charge from the DASS website: [www.psy.unsw.edu.au/dass/](http://www.psy.unsw.edu.au/dass/).
