# Supplementary material
Source: publisher site journal article supplement (https://www.dovepress.com/article/302144)
Supplement: Supplementary file 2 [file get_supplementary_file.php]

## **Immune Status Questionnaire (ISQ)**

### **Instruction**

Please indicate how often you have had the following complaints in the last month (during COVID-19 Pandemic curfew) .

### **Each item of the ISQ can be scored as follows:**

- 0= Never
- 1= Sometimes
- 2= Regularly
- 3= Often
- 4= Always (Almost)

### **Questions:**

1. Sudden high fever
2. Diarrhoea
3. Headache
4. Skin Problem (e.g. acne, eczema)
5. Muscle and joint pain
6. Common cold
7. Coughing

Calculate the sum score of the 7 ISQ items. To obtain the final ISQ score, translate the “raw” ISQ scores as follows: Interpretation: 0 = very poor, 10 excellent perceived immune status. Cut off for reduced immune functioning: ISQ < 6.

**Table A1. ISQ Scoring instructions.**

| <b>Raw Score</b> | <b>Final Score</b> |
|------------------|--------------------|
| $\geq 15$        | 0                  |
| 14               | 1                  |
| 13               | 2                  |
| 11, 12           | 3                  |
| 10               | 4                  |
| 8, 9             | 5                  |
| 7                | 6                  |
| 6                | 7                  |
| 5                | 8                  |
| 3, 4             | 9                  |
| $\leq 2$         | 10                 |

**Notes:** Reproduced/adapted from Wilod Versprille LJF, van de Loo AJAE, Mackus M, et al. Development and validation of the Immune Status Questionnaire (ISQ). *Int J Environ Res Public Health*.

2019;16(23):4743. Licensee MDPI, Basel, Switzerland. Creative Commons Attribution (CC BY) license (<http://creativecommons.org/licenses/by/4.0/>).
